# Supplementary material
Source: Springer Nature journal article supplement (https://www.springermedizin.de/resource/supplementary/12885_2013_5236_MOESM6_ESM.pdf/9466250)

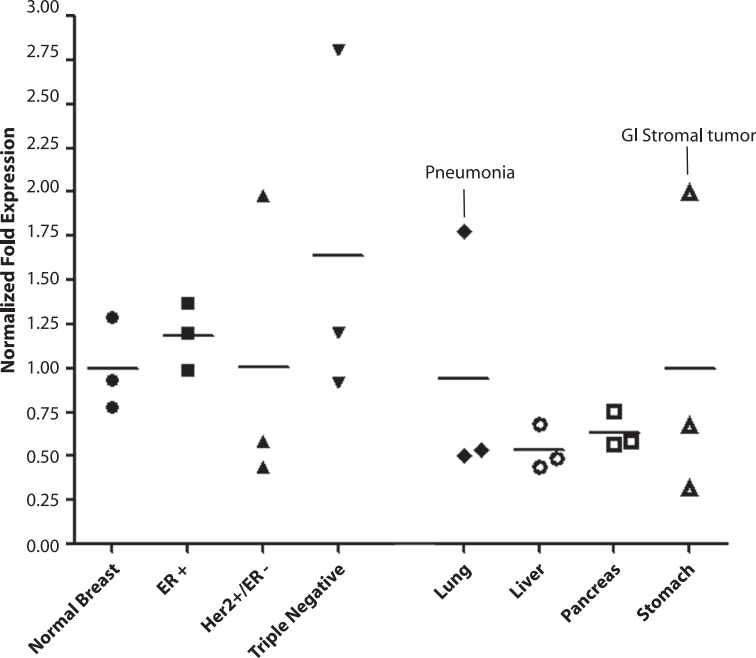

Supplement: MOESM6 [file 9466250]
